# Supplementary material for: Accessory gene regulator (Agr) functionality in Staphylococcus aureus derived from lower respiratory tract infections
Source: PubMed Central journal article supplement (PMC5391941; doi:10.1371/journal.pone.0175552), 2017-04-14
Supplement: pone.0175552.s001.pdf [file pone.0175552.s001.pdf]

**S1 Table.** Fluorescence values obtained by the VLT for the 148 strains analysed.

| LRTI (n=95) |            |              |           |            |              | Carrier (n=35) |             |              | Bacteraemia (n=18) |            |              |
|-------------|------------|--------------|-----------|------------|--------------|----------------|-------------|--------------|--------------------|------------|--------------|
| Strain ID   | Average    | Error (95CI) | Strain ID | Average    | Error (95CI) | Strain ID      | Average     | Error (95CI) | Strain ID          | Average    | Error (95CI) |
| S1          | 0,02456297 | 0,00265514   | S182      | 0,89991233 | 0,00714694   | S114           | 1,009858641 | 0,02247334   | S4207              | 0,95217198 | 0,02832673   |
| S10         | 0,79209133 | 0,02949091   | S183      | 0,9931736  | 0,02746595   | S125           | 0,880610104 | 0,0221353    | S3758              | 0,97556236 | 0,02090963   |
| S11         | 0,01787501 | 0,00337977   | S184      | 0,89229586 | 0,04872532   | S127           | 0,932508736 | 0,02662337   | S4124              | 0,917556   | 0,03394953   |
| S111        | 0,86225055 | 0,06735298   | S185      | 0,97935027 | 0,06596011   | S128           | 0,978575232 | 0,01116791   | S3884              | 0,9804887  | 0,01004861   |
| S112        | 0,02159244 | 0,00685736   | S186      | 0,96095118 | 0,07533344   | S139           | 0,964944542 | 0,02201264   | S4143              | 0,94382621 | 0,02234311   |
| S115        | 0,87375312 | 0,00827323   | S189      | 0,93252387 | 0,04703177   | S140           | 0,024324058 | 0,00473581   | S4035              | 0,01517136 | 0,01455213   |
| S116        | 0,26844689 | 0,22847196   | S19       | 0,01025832 | 0,00293959   | S145_33        | 0,077766437 | 0,02463041   | S4145              | 1,02293614 | 0,00737643   |
| S118        | 0,85050679 | 0,04754728   | S191      | 0,94823515 | 0,05506819   | S149           | 0,912578355 | 0,01832571   | S3886              | 1,02098084 | 0,0331476    |
| S12         | 0,03836525 | 0,00071547   | S192      | 1,0388999  | 0,01129192   | S150           | 0,962114602 | 0,01873556   | S3306              | 1,02072815 | 0,0189657    |
| S121        | 0,90336808 | 0,05958427   | S193      | 0,80739656 | 0,04599483   | S151           | 0,029470747 | 0,00440694   | S4032              | 0,94757734 | 0,05132346   |
| S124        | 0,95259713 | 0,06105877   | S194      | 0,79054182 | 0,03990784   | S152           | 0,976524373 | 0,02575922   | S3750              | 0,99920022 | 0,02245283   |
| S126        | 0,93004278 | 0,0245472    | S197_1    | 0,93259055 | 0,09353579   | S153           | 0,983250784 | 0,01658773   | S3849              | 1,00869949 | 0,01392641   |
| S129        | 0,93074142 | 0,03014449   | S197_2    | 0,99108629 | 0,07890485   | S154           | 0,968349246 | 0,0586231    | S4077              | 1,00288266 | 0,02321918   |
| S13         | 0,96310741 | 0,03815544   | S2        | 0,86735502 | 0,02299982   | S155           | 0,988629139 | 0,02031666   | S4171              | 0,92708717 | 0,03249798   |
| S131        | 0,82574439 | 0,0672454    | S20       | 0,86607964 | 0,05607125   | S158           | 0,906283137 | 0,06614062   | S4172              | 0,95370084 | 0,05166634   |
| S132        | 0,85500904 | 0,0749191    | S21       | 0,94267302 | 0,01075891   | S159           | 0,867341825 | 0,03273664   | S4084              | 0,94864944 | 0,02000635   |
| S133        | 0,82938525 | 0,04655242   | S22       | 0,75181019 | 0,04791424   | S160           | 0,990863578 | 0,03018324   | S4293              | 0,91684208 | 0,047326     |
| S135        | 0,87620524 | 0,01871512   | S23       | 0,00406972 | 0,00378541   | S163           | 1,034140629 | 0,03077654   | S4081              | 0,98241456 | 0,04794353   |
| S136        | 0,85351359 | 0,09985262   | S28       | 1,03638608 | 0,03741302   | S166_29        | 0,873600341 | 0,06483697   |                    |            |              |
| S137        | 0,94468999 | 0,08805006   | S29       | 0,50020572 | 0,02169529   | S167_32        | 0,856080803 | 0,04901898   |                    |            |              |
| S138        | 0,0036778  | 0,00044815   | S3        | 0,89693798 | 0,01926997   | S169           | 0,935557912 | 0,01980629   |                    |            |              |
| S14         | 0,9162363  | 0,06081323   | S33       | 0,48626612 | 0,00984714   | S176           | 1,037775098 | 0,03426243   |                    |            |              |
| S141        | 0,99675011 | 0,02388897   | S34       | 0,0350992  | 0,00544157   | S178           | 0,92085507  | 0,05349073   |                    |            |              |
| S142        | 0,85933863 | 0,03179099   | S35       | 0,02766245 | 0,0042973    | S185_2         | 0,968519438 | 0,01559492   |                    |            |              |
| S144        | 0,92387127 | 0,03095473   | S36       | 0,94194734 | 0,00861137   | S188           | 0,013054705 | 0,00270469   |                    |            |              |
| S145        | 0,09822113 | 0,08805956   | S37       | 0,86978494 | 0,02255845   | S24            | 0,008883547 | 0,00927109   |                    |            |              |
| S146        | 1,01319628 | 0,01995257   | S4        | 0,8601248  | 0,03566051   | S25            | 0,703104899 | 0,07459606   |                    |            |              |
| S148        | 0,9085734  | 0,02353556   | S41       | 0,93634552 | 0,01920548   | S26            | 0,870779876 | 0,35394354   |                    |            |              |
| S15         | 0,96357967 | 0,01625972   | S43       | 0,02694003 | 0,00899761   | S27            | 1,052727652 | 0,029553     |                    |            |              |
| S157        | 0,80796563 | 0,07830949   | S44       | 0,99002129 | 0,0236533    | S30            | 1,045715842 | 0,04159407   |                    |            |              |
| S16         | 0,96698732 | 0,05663086   | S46       | 0,91609716 | 0,08014651   | S31            | 1,045727432 | 0,0836321    |                    |            |              |
| S162        | 0,91447926 | 0,00418077   | S47       | 0,90356807 | 0,04112787   | S32            | 0,031651658 | 0,01211526   |                    |            |              |
| S165        | 0,95319833 | 0,03852068   | S48       | 0,90290571 | 0,05024833   | S38            | 0,873954116 | 0,01703038   |                    |            |              |
| S166        | 0,89772144 | 0,06699516   | S5        | 0,79743859 | 0,01038664   | S39            | 1,016168969 | 0,00691968   |                    |            |              |
| S167_1      | 0,88852496 | 0,01584848   | S50       | 0,04086193 | 0,00862572   | S40            | 0,953585401 | 0,0673243    |                    |            |              |
| S167_2      | 0,91837926 | 0,01455271   | S52       | 0,94633943 | 0,01179064   |                |             |              |                    |            |              |
| S168        | 0,81527805 | 0,04059112   | S53       | 0,92332028 | 0,08225229   |                |             |              |                    |            |              |
| S17         | 0,94318592 | 0,02283877   | S54       | 0,90760042 | 0,01049525   |                |             |              |                    |            |              |
| S170        | 0,7961608  | 0,02128268   | S55       | 0,80542682 | 0,02906871   |                |             |              |                    |            |              |
| S177        | 0,02082983 | 0,00596207   | S56       | 0,02356792 | 0,00239117   |                |             |              |                    |            |              |
| S18         | 0,90871837 | 0,08013206   | S59       | 0,95218021 | 0,04699104   |                |             |              |                    |            |              |
| S181        | 0,94192278 | 0,0703737    | S6        | 1,04843263 | 0,01188224   |                |             |              |                    |            |              |
| S68         | 0,92171052 | 0,0139334    | S60       | 0,83629228 | 0,1122626    |                |             |              |                    |            |              |
| S69         | 0,92098747 | 0,07463326   | S61       | 0,88018744 | 0,0683089    |                |             |              |                    |            |              |
| S7          | 0,87770515 | 0,07679344   | S63       | 0,92439831 | 0,06983527   |                |             |              |                    |            |              |
| S71         | 0,90933004 | 0,0237831    | S65       | 0,02835157 | 0,00351453   |                |             |              |                    |            |              |
| S9          | 0,79584406 | 0,00921193   | S66       | 0,82270078 | 0,01632382   |                |             |              |                    |            |              |
|             |            |              | S67       | 0,89486246 | 0,06221239   |                |             |              |                    |            |              |

Strain name, average of triplicate experiments and corresponding 95% confidence error is illustrated.
